# Supplementary material for: Screening Biophysical Sensors and Neurite Outgrowth Actuators in Human Induced-Pluripotent-Stem-Cell-Derived Neurons
Source: MDPI journal article supplement (doi:10.3390/cells11162470), 2022-08-09
Supplement: s1 [file s1]

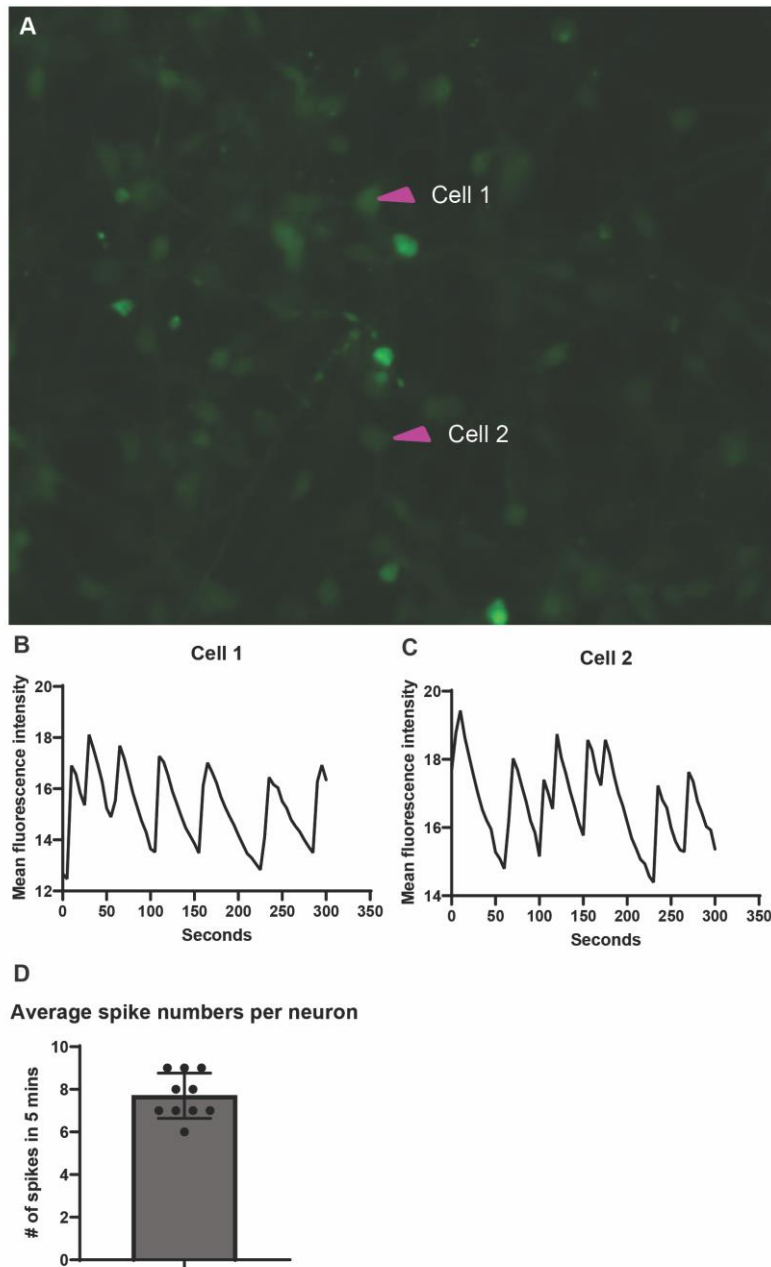

**Figure S1.** Calcium spiking behavior in hiNSC derived neurons. hiNSC derived day 10 neurons stained with Fluo4 AM an intracellular  $\text{Ca}^{2+}$  ion reporter and imaged for 5 min at 5 s interval as depicted in movie S1. (A) first frame of the movie indicating the two cells whose fluorescence was quantified. (B-C) Quantification of changes in fluorescent signal in two indicated cells over 5mins showing calcium spiking in the cells. (D) Average number of calcium spikes in neurons over 5 min.

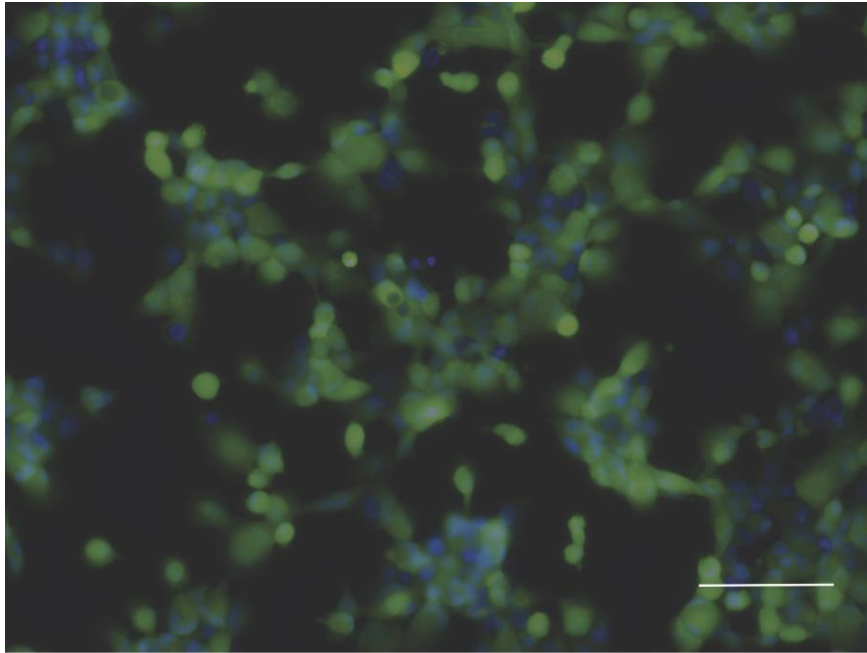

**Figure S2.** NeuO stains non-neural M0 macrophage cells. THP-1 derived M0 macrophage cells stained with NeuO (green) showing live cell body and Hoechst (blue) showing nuclei. Scale bars, 100  $\mu\text{m}$ .

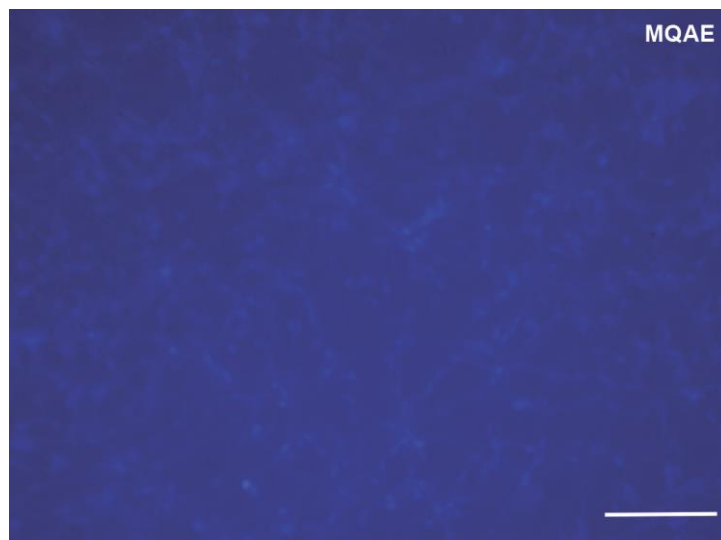

**Figure S3.** MQAE live stain fail to label hiNSC derived neurons. hiNSC derived day 10 neurons stained with MQAE an intracellular  $\text{Cl}^-$  ion reporter. Scale bars, 100  $\mu\text{m}$ .

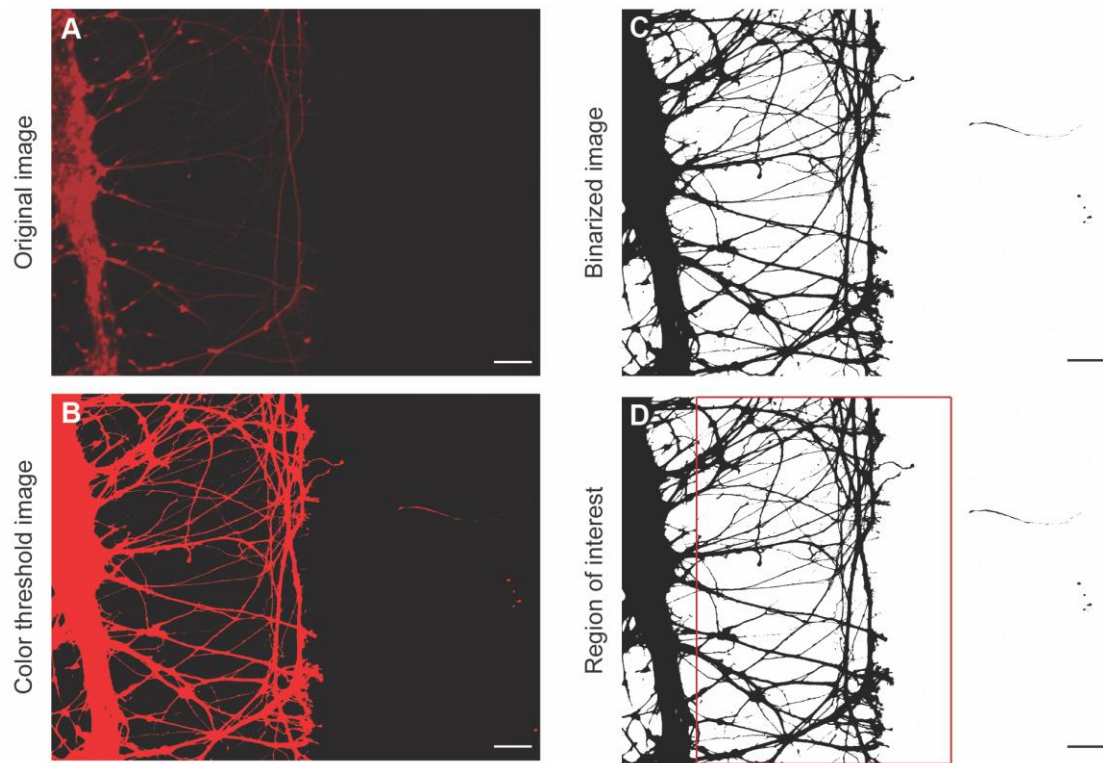

**Figure S4.** Quantitative determination of neurite outgrowth from scratch injured neurons. hiNSC derived neurons stained with Calcein Red-Orange AM live stain after scratch injury to quantify neurite outgrowth into the scratch. (A) Original Calcein Red-Orange AM image of neurite outgrowth. (B) Same original image after it has undergone color thresholding. (C) Binarization of color thresholded image. (D) Demarcation of region of interest (magenta square) for measurement of integrated density of fluorescent signal in the region of interest. Measure of neurite outgrowth is obtained by dividing integrated density with the area of region of interest. All scale bars, 100  $\mu\text{m}$ .

**Table S1.** Ionic composition (in mM) of extracellular solutions with changing  $\text{Na}^+$  ion concentration and physiological levels in green. Adapted from [85].

| NaCl | KCl | $\text{CaCl}_2$ | $\text{MgCl}_2$ | NMDG-Cl | HEPES | Glucose | $\text{Na}^+$ | $\text{K}^+$ | NMDG $^+$ | $\text{Cl}^-$ |
|------|-----|-----------------|-----------------|---------|-------|---------|---------------|--------------|-----------|---------------|
| 28   | 5.4 | 1.8             | 1               | 112     | 10    | 5.5     | 28            | 5.4          | 112       | 151           |
| 56   | 5.4 | 1.8             | 1               | 84      | 10    | 5.5     | 56            | 5.4          | 84        | 151           |
| 84   | 5.4 | 1.8             | 1               | 56      | 10    | 5.5     | 84            | 5.4          | 56        | 151           |
| 112  | 5.4 | 1.8             | 1               | 28      | 10    | 5.5     | 112           | 5.4          | 28        | 151           |
| 140  | 5.4 | 1.8             | 1               | 0       | 10    | 5.5     | 140           | 5.4          | 0         | 151           |

**Table S2.** Ionic composition (in mM) of extracellular solutions with changing  $\text{K}^+$  ion concentration and physiological levels in green. Adapted from [85].

| NaCl | KCl   | $\text{CaCl}_2$ | $\text{MgCl}_2$ | NMDG-Cl | HEPES | Glucose | $\text{Na}^+$ | $\text{K}^+$ | NMDG $^+$ | $\text{Cl}^-$ |
|------|-------|-----------------|-----------------|---------|-------|---------|---------------|--------------|-----------|---------------|
| 0    | 5.4   | 1.8             | 1               | 140     | 10    | 5.5     | 0             | 5.4          | 140       | 151           |
| 0    | 35.4  | 1.8             | 1               | 110     | 10    | 5.5     | 0             | 35.4         | 110       | 151           |
| 0    | 65.4  | 1.8             | 1               | 80      | 10    | 5.5     | 0             | 65.4         | 80        | 151           |
| 0    | 100.4 | 1.8             | 1               | 45      | 10    | 5.5     | 0             | 100.4        | 45        | 151           |
| 0    | 135.4 | 1.8             | 1               | 10      | 10    | 5.5     | 0             | 135.4        | 10        | 151           |

**Table S3.** Ionic composition (in mM) of extracellular solutions within changing Na<sup>+</sup> and K<sup>+</sup> ion concentration for generating various resting membrane potentials with physiological levels in green. Adapted from [85].

| NaCl | KCl   | CaCl <sub>2</sub> | MgCl <sub>2</sub> | NMDG-Cl | HEPES | Glucose |
|------|-------|-------------------|-------------------|---------|-------|---------|
| 140  | 5.4   | 1.8               | 1                 | 0       | 10    | 5.5     |
| 110  | 35.4  | 1.8               | 1                 | 0       | 10    | 5.5     |
| 80   | 65.4  | 1.8               | 1                 | 0       | 10    | 5.5     |
| 45   | 100.4 | 1.8               | 1                 | 0       | 0     | 5.5     |
| 10   | 135.4 | 1.8               | 1                 | 0       | 0     | 5.5     |

| Na <sup>+</sup> | K <sup>+</sup> | NMDG <sup>+</sup> | Cl <sup>-</sup> |
|-----------------|----------------|-------------------|-----------------|
| 140             | 5.4            | 0                 | 151             |
| 110             | 35.4           | 0                 | 151             |
| 80              | 65.4           | 0                 | 151             |
| 45              | 100.4          | 0                 | 151             |
| 10              | 135.4          | 0                 | 151             |

## References

85. Bonzanni, M.; Payne, S.L.; Adelfio, M.; Kaplan, D.L.; Levin, M.; Oudin, M.J. Defined extracellular ionic solutions to study and manipulate the cellular resting membrane potential. *Biol. Open* **2020**, *9*, 1.
